# Supplementary material for: Soluble immune checkpoint factors reflect exhaustion of antitumor immunity and response to PD-1 blockade
Source: PubMed Central journal article supplement (PMC10977985; doi:10.1172/jci168318), 2024-04-01
Supplement: jci-134-168318-s216.pdf [file jci-134-168318-s216.pdf]

- 1 **List of Supplemental Material**
- 2 Supplemental Methods
- 3 Supplemental Figures 1 to 15
- 4 Supplemental Tables 1 to 4

## 5 **Supplemental Methods**

### 6 **Study design and patients**

7 The overall design of the study is outlined in Figure 1. From December 2015 to  
8 September 2016, 50 previously treated patients with advanced or recurrent NSCLC  
9 were prospectively enrolled in a phase 2 biomarker-finding trial, Nivolution, that was  
10 conducted at Kindai University Hospital. Patients were eligible for enrollment if an  
11 archival tumor tissue specimen obtained within 1 year before enrollment or newly  
12 biopsied tissue was available. Nivolumab (3 mg/kg) was administered intravenously  
13 biweekly. Radiologic imaging was performed every 6 weeks. Tumor response was  
14 assessed according to Response Evaluation Criteria in Solid Tumors (RECIST) version  
15 1.1 (1). The study protocol was approved by the ethics committee at Kindai University  
16 Hospital and Kyoto University Hospital. Each patient provided written informed  
17 consent before enrollment.

18 For the cohorts B and C, patients with advanced or recurrent NSCLC receiving  
19 antibodies to PD-1 or to PD-L1—including nivolumab, pembrolizumab, and  
20 atezolizumab—were enrolled for a retrospective study conducted at Kindai University  
21 Hospital, Kyoto University Hospital and Izumi City General Hospital. Also, for the  
22 cohort D and E, patients with advanced or recurrent NSCLC receiving cytotoxic  
23 chemotherapy without ICB therapy or TKIs as an initial therapy, respectively, were  
24 retrospectively enrolled at Kindai University Hospital and Kyoto University Hospital.  
25 Blood samples and medical records were obtained for all patients. Tumor response was  
26 assessed by computed tomography every 6 to 12 weeks according to RECIST version  
27 1.1. These studies were conducted according to the Declaration of Helsinki, and the  
28 protocols were approved by the Institutional Review Board of each hospital.

### 30 **Immunohistochemistry**

31 Tumor histology was classified according to WHO criteria (2). In the Nivolution trial,  
32 sections of formalin-fixed paraffin-embedded tumor tissue were subjected to IHC with  
33 monoclonal antibodies to PD-L1 (kit with clone 28-8, Abcam) and to CD8 (clone  
34 C8/144B, Dako). The percentage of tumor cells positive for PD-L1 (tPD-L1) was  
35 determined as previously described (3, 4). TILs were evaluated on the basis of staining  
36 for CD8. Tumor tissue samples including at least 100 viable tumor cells were eligible  
37 for assessment of TILs. The number of TILs was determined at an absolute  
38 magnification of 400× (0.20 mm<sup>2</sup> per field). At least one and a maximum of five  
39 scanned fields of tumor regions were randomly chosen for each TIL count. TILs were  
40 counted by a board-certified pathologist, and the density of TILs in each tumor was

41 calculated by dividing the number of TILs by the viewed fields (4). The cutoff value of  
42 12.0/field was determined on the basis of the median number of tumor-infiltrated CD8<sup>+</sup>  
43 T cells per field.

44

#### 45 **Gene expression analysis by RNA-seq**

46 The RNA extracted from tissue samples and blood cells was subjected to reverse  
47 transcription with the use of a SuperScript VILO cDNA Synthesis Kit (Thermo Fisher  
48 Scientific), and the resulting cDNA was subjected to multiplex PCR amplification, end  
49 repair, and ligation of barcoded adaptors. Pooled libraries were processed with an Ion  
50 Chef System (Thermo Fisher Scientific) for template preparation. Libraries were then  
51 loaded onto an Ion 550 chip and sequenced with the Ion S5 XL sequencing system. Ion  
52 Torrent Suite v5.10 software (Thermo Fisher Scientific) was used for base calling,  
53 alignment to the human reference genome (hg19), and quality control. Raw reads were  
54 analyzed automatically with the AmpliSeqRNA plugin to generate gene-level  
55 expression values for all 20,802 RefSeq human genes.

56

#### 57 **Flow cytometry**

58 Fresh PBMCs were isolated from blood by Ficoll (EG Healthcare) density gradient  
59 centrifugation and were immediately stained with antibodies to CD8a (RPA-T8,  
60 Tonbo), to CD8 (SK1, Tonbo), and to PD-1 (EH12.2H7, BioLegend). Discrimination  
61 between live and dead cells was performed by staining with 7-aminoactinomycin D (7-  
62 AAD) (Tonbo, 13-6993), and data were gated on live (7AAD-negative) and single cells.  
63 Acquisition of samples was performed with a BD FACSCanto II cell analyzer (BD  
64 Biosciences). Data were collected with the use of BD FACSDiva software version 6.1.3  
65 and further analyzed with FlowJo 10.4 (Tree Star).

66

#### 67 **Microarray analysis of peripheral CD8<sup>+</sup> T cells and gene enrichment analysis**

68 CD8<sup>+</sup> T cells were purified from PBMCs with an AutoMACS system (Miltenyi Biotec).  
69 Total RNA was isolated from the cells with an RNeasy Micro Prep Kit (Qiagen), and its  
70 quality was analyzed with TapeStation (Agilent). Portions (5 ng) of the total RNA were  
71 labeled with the use of a GeneChip WT Pico Reagent Kit (Thermo Fisher Scientific)  
72 and subjected to hybridization with a Human GeneChip Clariom D Array (Thermo  
73 Fisher Scientific). The array data were analyzed with Signal Space Transformation–  
74 Robust Multichip Analysis (SST-RMA) and Sketch-Quantile normalization (Expression  
75 Console Software).

76

77 **Cytokine analysis**

78 Plasma samples were obtained by centrifugation of EDTA-treated whole blood at 2400  
 79  $\times g$  for 10 min at 4°C. Concentrations of the cytokines shown in Figure 6D were  
 80 measured with V-PLEX Plus Proinflammatory Panel 1, Cytokine Panel 1, V-PLEX Plus  
 81 Cytokine Panel 1 (Human), V-PLEX Plus Chemokine Panel 1 (Human), and Human  
 82 ELISA Kits (Meso Scale Discovery Electrochemiluminescence Service). All assays  
 83 were performed in triplicate. A correlation matrix for the plasma concentrations of the  
 84 cytokines as well as those of sPD-1, sPD-L1, and sCTLA-4 was generated by Ward’s  
 85 clustering with squared Euclidean distances.

86  
 87 **Determination of the cutoff values defining high versus low concentrations of each**  
 88 **soluble factor**

89 The cutoff values for soluble factor concentrations were determined with a proportional  
 90 hazards model. A Cox proportional hazards model was thus fitted to the PFS data in  
 91 order to estimate the HR for each covariate of interest. After sorting according to the  
 92 biomarker values, dummy variables such as those shown in Supplemental Methods  
 93 Table 1 below were generated.

94  
 95 **Supplemental Methods Table 1**

| Time | Censor | Biomarker | DB(1) | DB(2) | DB(3) | DB(4) | DB(5) | DB(6) | DB(...) |
|------|--------|-----------|-------|-------|-------|-------|-------|-------|---------|
| 12   | 1      | 21        | 0     | 0     | 0     | 0     | 0     | 0     | ..      |
| 1    | 1      | 23        | 1     | 0     | 0     | 0     | 0     | 0     | ...     |
| 7    | 1      | 24        | 1     | 1     | 0     | 0     | 0     | 0     | ...     |
| 1    | 0      | 25        | 1     | 1     | 1     | 0     | 0     | 0     | ...     |
| 10   | 1      | 26        | 1     | 1     | 1     | 1     | 0     | 0     | ...     |
| 7    | 1      | 27        | 1     | 1     | 1     | 1     | 1     | 0     | ...     |
| 10   | 1      | 28        | 1     | 1     | 1     | 1     | 1     | 1     | ...     |
| ...  | ...    | ...       | ...   | ...   | ...   | ...   | ...   | ...   | ...     |

96  
 97 The HR was then calculated from the proportional hazards model, with the explanatory  
 98 variable being DB(X). The results are summarized in Supplemental Methods Table 2  
 99 below.

100

101 **Supplemental Methods Table 2**

| Explanatory variable | HR  | log[HR] |
|----------------------|-----|---------|
| DB(1)                | ... | ...     |
| DB(2)                | ... | ...     |
| DB(3)                | ... | ...     |
| DB(4)                | ... | ...     |

|         |     |     |
|---------|-----|-----|
| DB(5)   | ... | ... |
| DB(6)   | ... | ... |
| DB(...) | ... | ... |

102

103 From the latter table, DB(X) for which the absolute value of log[HR] is maximum was  
 104 identified. The point in Supplemental Methods Table 1 corresponding to the identified  
 105 DB(X) is the cutoff point. For example, if DB(4) gives the maximum absolute value of  
 106 log[HR], the cutoff point is the value between 25 and 26 in Supplemental Methods  
 107 Table 1.

108

109 **Supplemental Methods Reference**

110 1. Eisenhauer EA, Therasse P, Bogaerts J, Schwartz LH, Sargent D, Ford R, et al.  
 111 New response evaluation criteria in solid tumours: revised RECIST guideline  
 112 (version 1.1). *Eur J Cancer*. 2009;45(2):228-47.

113 2. Travis WD, Brambilla E, Nicholson AG, Yatabe Y, Austin JHM, Beasley MB, et  
 114 al. The 2015 World Health Organization Classification of Lung Tumors: Impact  
 115 of Genetic, Clinical and Radiologic Advances Since the 2004 Classification. *J*  
 116 *Thorac Oncol*. 2015;10(9):1243-60.

117 3. Borghaei H, Paz-Ares L, Horn L, Spigel DR, Steins M, Ready NE, et al.  
 118 Nivolumab versus Docetaxel in Advanced Nonsquamous Non-Small-Cell Lung  
 119 Cancer. *N Engl J Med*. 2015;373(17):1627-39.

120 4. Haratani K, Hayashi H, Tanaka T, Kaneda H, Togashi Y, Sakai K, et al. Tumor  
 121 immune microenvironment and nivolumab efficacy in EGFR mutation-positive  
 122 non-small-cell lung cancer based on T790M status after disease progression  
 123 during EGFR-TKI treatment. *Ann Oncol*. 2017;28(7):1532-9.

124

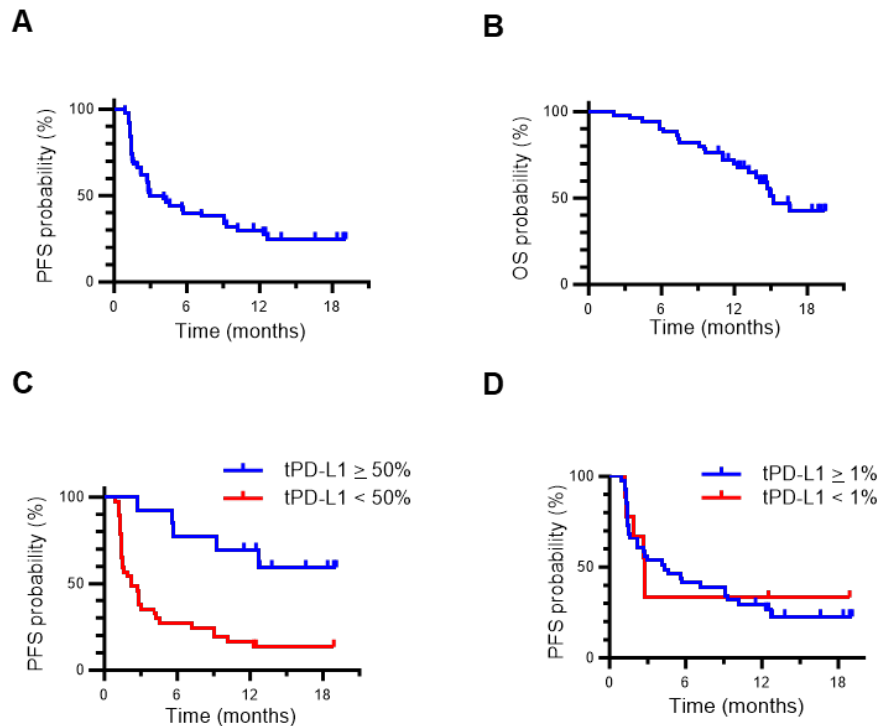

125 **Supplemental Figure 1. Survival curves for patients in the Nivolution trial (cohort**  
 126 **A).** (A and B) Kaplan-Meier curves for PFS and overall survival (OS), respectively, for  
 127 all 50 patients in the trial. (C and D) Kaplan-Meier curves for PFS according to high ( $n$   
 128 = 13 and 37, respectively) or low ( $n$  = 41 and 9, respectively) tPD-L1 based on cutoffs  
 129 of 50% (C) or 1% (D). For the tPD-L1 cutoff of 50% (C) median PFS was not reached  
 130 and 2.2 months for high and low tPD-L1, respectively (log-rank  $P$  = 0.0004), with an  
 131 HR for high versus low tPD-L1 of 0.20 (95% CI, 0.08–0.53). For the tPD-L1 cutoff of  
 132 1% (D), median PFS was 4.3 and 2.8 months for high and low tPD-L1, respectively  
 133 (log-rank  $P$  = 0.88), with an HR for high versus low tPD-L1 of 0.93 (95% CI, 0.40–  
 134 2.20).

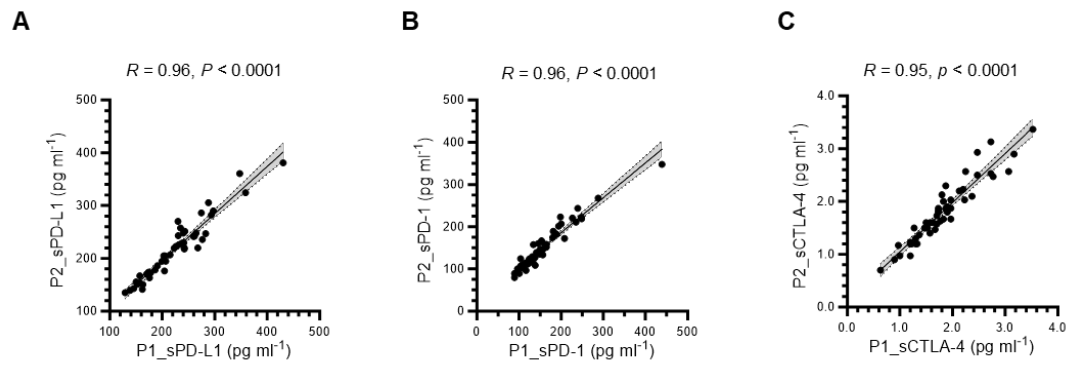

135

136 **Supplemental Figure 2. Consistent detection of soluble immune factors in plasma**  
 137 **of patients in the Nivolumab trial before treatment.** Pearson correlation between the  
 138 concentrations of sPD-L1 (A), sPD-1 (B), or sCTLA-4 (C) measured in plasma  
 139 obtained at time P1 (2 weeks to 72 h prior to the start of treatment) and at P2 (within 24  
 140 h prior to the start of treatment) for all 50 patients.

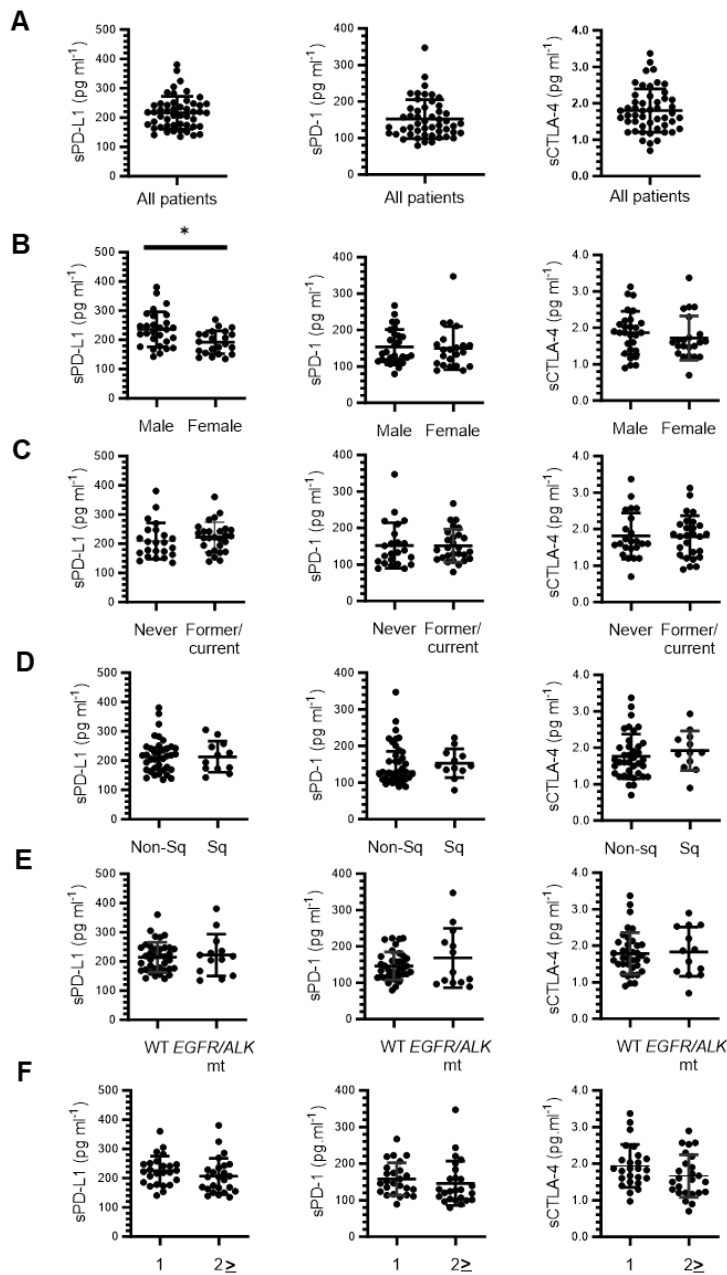

141

142 **Supplemental Figure 3. Plasma concentrations of soluble immune factors**  
 143 **according to patient characteristics for the Nivolution trial. (A)** Concentrations of  
 144 sPD-L1, sPD-1, and sCTLA-4 in plasma of all 50 patients. **(B–F)** Comparison of the  
 145 levels of the soluble immune factors between patients classified according to sex **(B)**,  
 146 smoking status **(C)**, histology **(D)**, oncogenic driver mutations **(E)**, or number of prior  
 147 therapies **(F)**. Sq, squamous cell carcinoma; non-Sq, non-squamous cell carcinoma;  
 148 WT, wild type; *EGFR*, epidermal growth factor receptor gene; *ALK*, anaplastic



149 lymphoma kinase gene; mt, mutation. Mean  $\pm$  SD values are indicated. \* $P < 0.005$   
150 (Mann-Whitney U test).  
151  
152

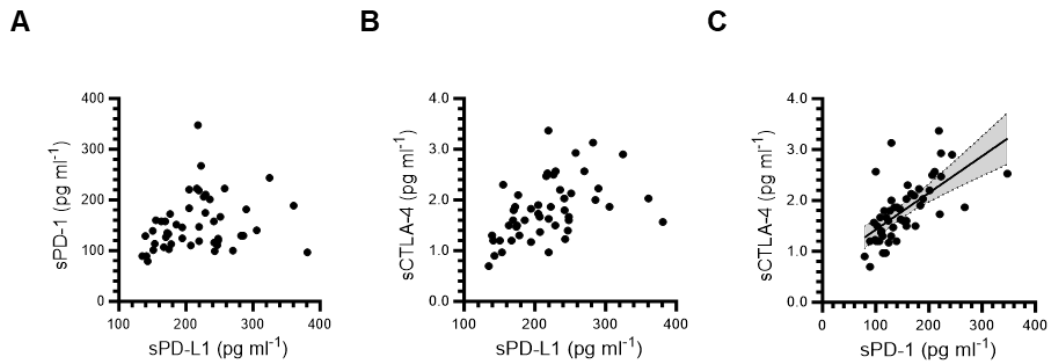

153

154 **Supplemental Figure 4. Correlation analysis for plasma concentrations of each**  
 155 **soluble immune factor for patients in the Nivolution trial.** Pearson correlation for  
 156 sPD-L1 versus sPD-1 (A), sPD-L1 versus sCTLA-4 (B), and sPD-1 versus sCTLA-4  
 157 (C) was determined for all patients ( $n = 50$ ). For (C), the correlation was characterized  
 158 by an  $R$  value of 0.64 and  $P < 0.0001$ ; the gray shaded area above and below the solid  
 159 line and bounded by the dotted lines indicates the 95% CI.

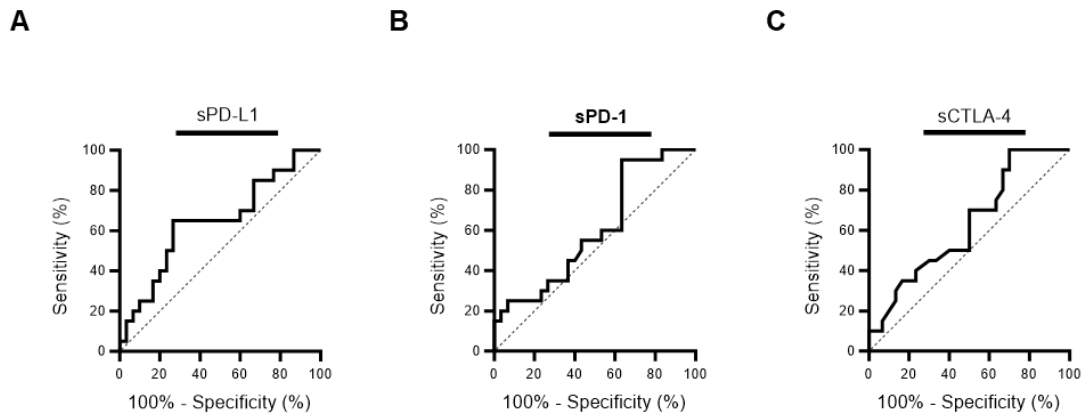

160

161 **Supplemental Figure 5. ROC curve analysis for each soluble immune factor and**  
 162 **prediction of 6-month PFS probability in the Nivolution trial.** ROC curve analysis  
 163 was performed for prediction of the 6-month PFS probability from the plasma  
 164 concentrations of sPD-L1 (A), sPD-1 (B), or sCTLA-4 (C) for all patients.

**A**

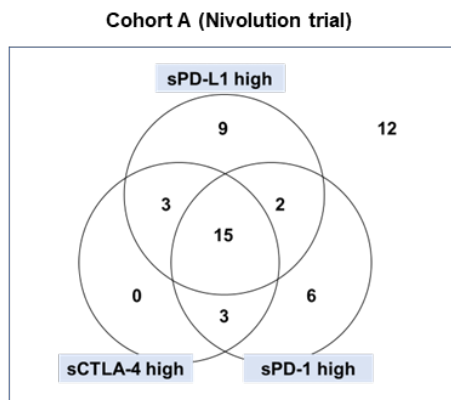

**B**

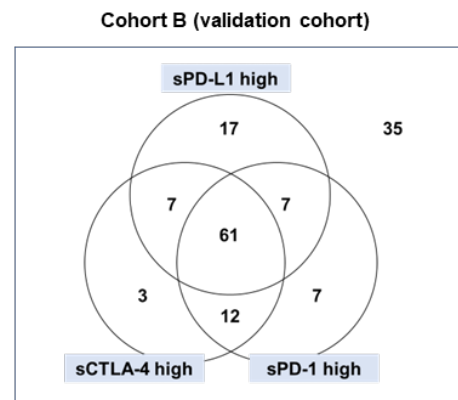

165

166

167

**Supplemental Figure 6. Venn diagrams for patients with high levels of soluble immune factors. (A) Cohort A, Nivolution trial. (B) Cohort B (validation cohort).**

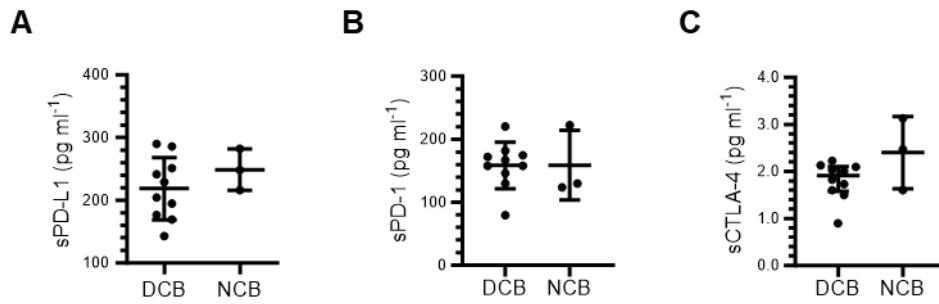

168

169 **Supplemental Figure 7. Concentrations of soluble immune factors according to**  
 170 **response for patients in the Nivolution trial with a tPD-L1 expression level of**  
 171 **≥50%. Plasma concentrations of sPD-L1 (A), sPD-1 (B), and sCTLA-4 (C) are**  
 172 compared between patients with a DCB ( $n = 10$ ) or NCB ( $n = 3$ ). Mean  $\pm$  SD values are  
 173 indicated.  $P$  values determined for the comparisons with the Mann-Whitney U test were  
 174 not significant.

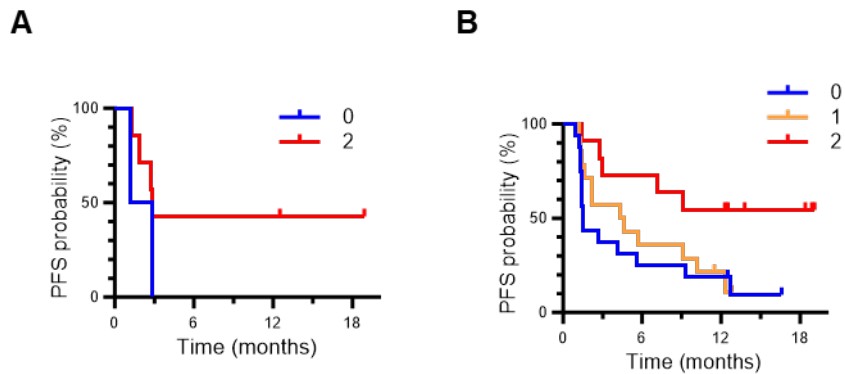

175

176

177

178

179

180

181

182

183

184

185

186

**Supplemental Figure 8. Stratification of patients with a tPD-L1 expression level of <1% or ≥1% in the Nivolumab trial according to the number of favorable immune factors.** Kaplan-Meier curves for PFS are shown for patients with tPD-L1 expression levels of <1% (**A**) or ≥1% (**B**) according to the number of favorable immune factors defined as sCTLA-4 or sPD-L1 concentrations below the determined cutoff values (log-rank  $P = 0.29$  and  $0.03$ , respectively). Median PFS was 2.8 months, not evaluated, and 2.2 months for 2, 1, and 0 favorable factors, respectively, in (**A**), and not reached, 4.5 months, and 1.5 months, respectively, in (**B**). The HR for 1 ( $n = 0$  and 14) versus 0 ( $n = 2$  and 16) was not evaluated and 0.78 (95% CI, 0.36–1.70), and that for 2 ( $n = 7$  and 11) versus 0 was 0.43 (95% CI, 0.05–3.50) and 0.30 (95% CI, 0.12–0.77), in (**A**) and (**B**), respectively.

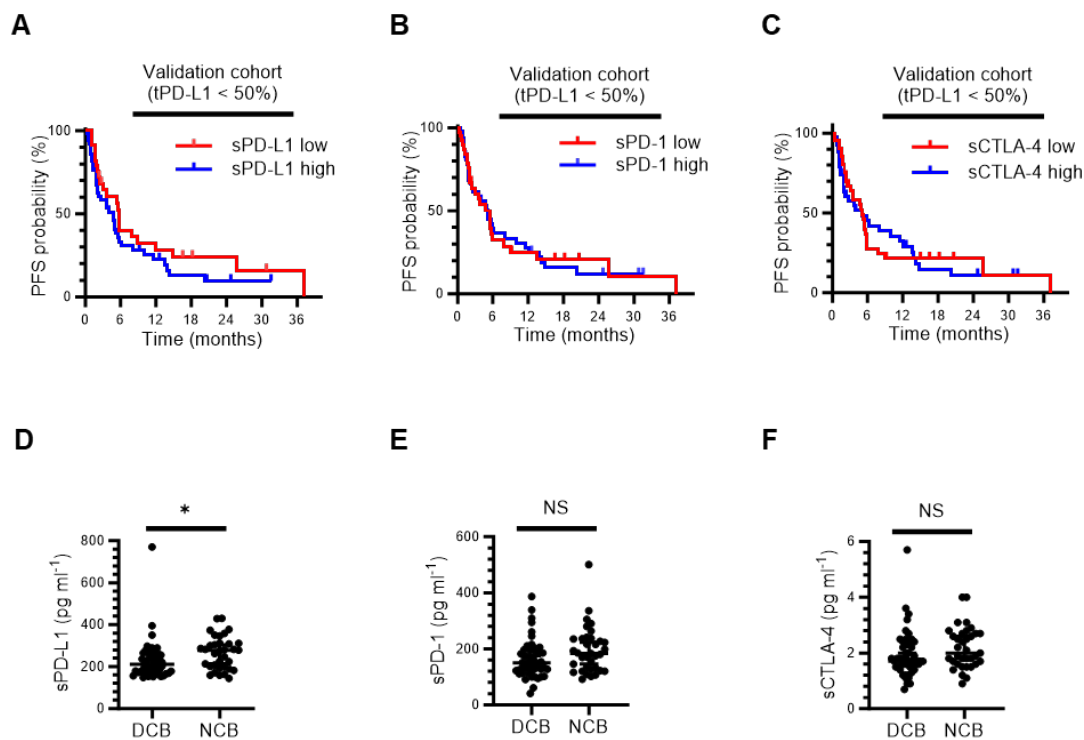

187  
 188 **Supplemental Figure 9.** (A–C) Kaplan-Meier curves for PFS of patients in the  
 189 validation cohort (cohort B) with a tPD-L1 expression level of <50% according to high  
 190 or low plasma concentrations of sPD-L1 (A), sPD-1 (B), or sCTLA-4 (C) based on the  
 191 determined cutoff values. For sPD-L1 (high,  $n = 51$ ; low,  $n = 34$ ), median PFS was 5.8  
 192 versus 4.7 months for low and high sPD-L1, respectively (log-rank  $P = 0.18$ ), with an  
 193 HR of 0.76 (95% CI, 0.47–1.23). For sPD-1 (high,  $n = 46$ ; low,  $n = 39$ ), median PFS  
 194 was 5.4 versus 5.1 months for low and high sPD-1, respectively (log-rank  $P = 0.98$ ),  
 195 with an HR of 1.12 (95% CI, 0.70–1.79). For sCTLA-4 (high,  $n = 42$ ; low,  $n = 43$ ),  
 196 median PFS was 5.0 versus 5.1 months for low and high sCTLA-4, respectively (log-  
 197 rank  $P = 0.82$ ), with an HR of 1.07 (95% CI, 0.67–1.71). (D–F) Comparison of  
 198 pretreatment plasma concentrations of sPD-L1 (D), sPD-1 (E), and sCTLA-4 (F) for  
 199 patients in the validation cohort (cohort B) with a tPD-L1 level of <50% between those  
 200 with a DCB ( $n = 50$ ) or NCB ( $n = 35$ ). Median  $\pm$  95% CI values are indicated.  $\{ *P <$   
 201 0.05, NS (Mann-Whitney U test).

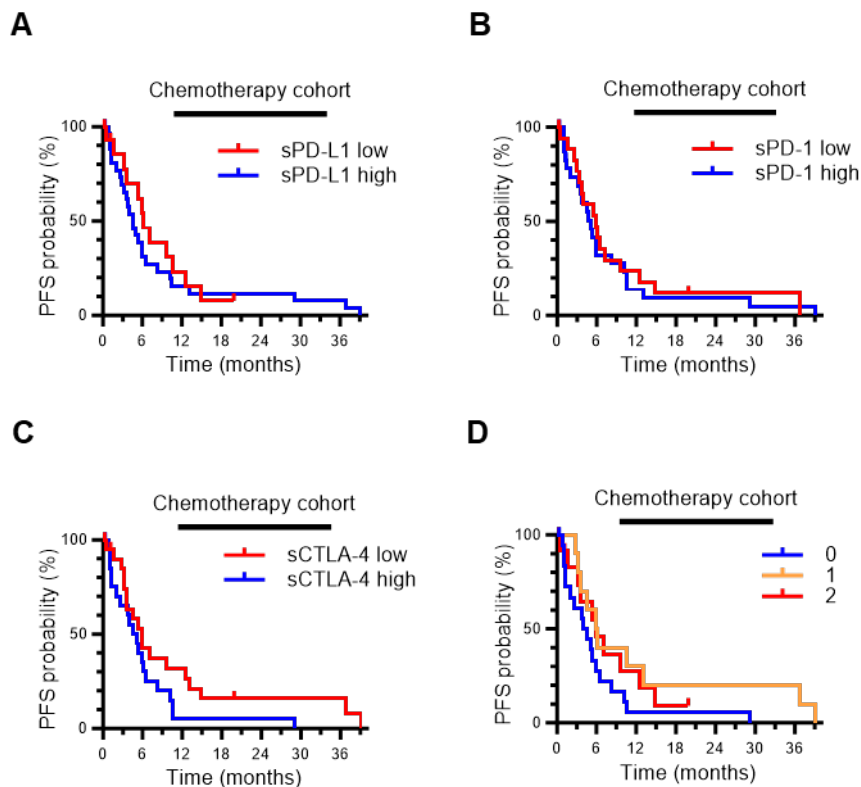

202

203 **Supplemental Figure 10. PFS curves for patients treated with cytotoxic**  
 204 **chemotherapy in a non-ICI cohort (cohort D).** (A–C) Kaplan-Meier curves for PFS  
 205 of patients treated with cytotoxic chemotherapy were determined according to high or  
 206 low plasma concentrations of sPD-L1 (A), sPD-1 (B), or sCTLA-4 (C) based on the  
 207 determined cutoff values. For sPD-L1 (high,  $n = 27$ ; low,  $n = 15$ ), median PFS was 6.1  
 208 versus 4.6 months for low and high sPD-L1, respectively (log-rank  $P = 0.51$ ), with an  
 209 HR of 0.75 (95% CI, 0.38–1.49). For sPD-1 (high,  $n = 24$ ; low,  $n = 18$ ), median PFS  
 210 was 6.0 versus 5.1 months for low and high sPD-1, respectively (log-rank  $P = 0.52$ ),  
 211 with an HR of 0.86 (95% CI, 0.45–1.64). For sCTLA-4 (high,  $n = 21$ ; low,  $n = 21$ ),  
 212 median PFS was 5.9 versus 4.9 months for low and high sCTLA-4, respectively (log-  
 213 rank  $P = 0.10$ ), with an HR of 0.57 (95% CI, 0.29–1.12). (D) Kaplan-Meier curves for  
 214 PFS among patients according to the number of favorable immune factors defined as  
 215 sCTLA-4 or sPD-L1 levels below the cutoff values (log-rank  $P = 0.136$ ). Median PFS  
 216 was 5.9, 6.0, and 4.3 months for 2, 1, and 0 favorable factors, respectively. The HR for  
 217 1 ( $n = 10$ ) versus 0 ( $n = 19$ ) was 0.45 (95% CI, 0.19–1.07), and that for 2 ( $n = 13$ )  
 218 versus 0 was 0.61 (95% CI, 0.28–1.34).

219



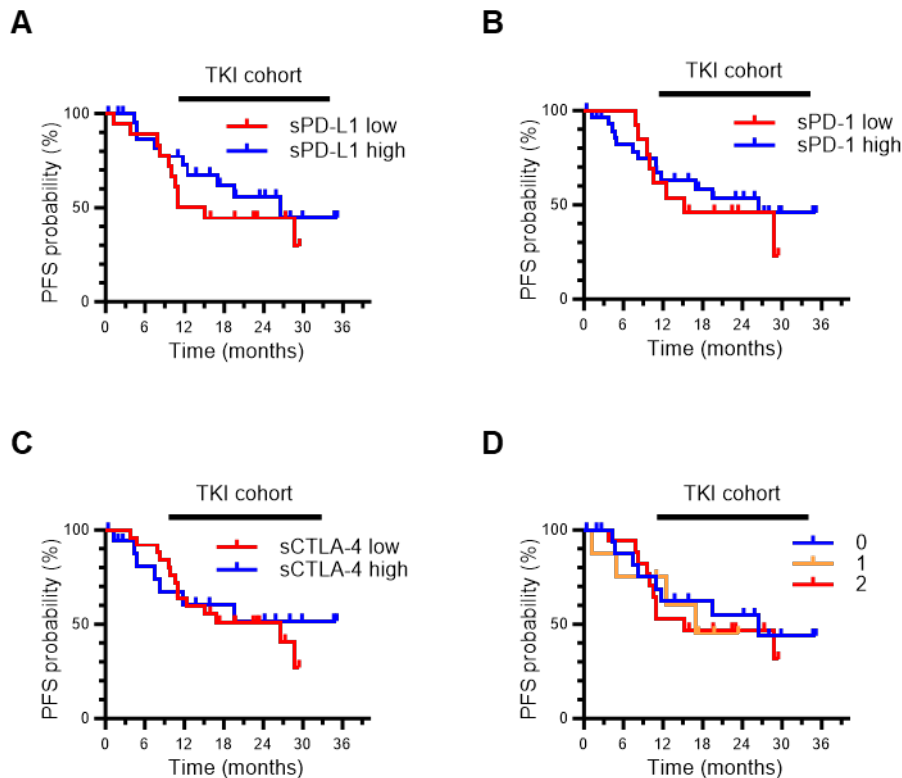

220  
 221 **Supplemental Figure 11. PFS curves for patients treated with TKIs in a non-ICI**  
 222 **cohort (cohort E).** (A–C) Kaplan-Meier curves for PFS of patients treated with TKIs  
 223 were determined according to high or low plasma concentrations of sPD-L1 (A), sPD-1  
 224 (B), or sCTLA-4 (C) based on the determined cutoff values. For sPD-L1 (high,  $n = 25$ ;  
 225 low,  $n = 18$ ), median PFS was 13.1 versus 26.5 months for low and high sPD-L1,  
 226 respectively (log-rank  $P = 0.32$ ), with an HR of 1.49 (95% CI, 0.63–3.55). For sPD-1  
 227 (high,  $n = 30$ ; low,  $n = 13$ ), median PFS was 15.1 versus 26.5 months for low and high  
 228 sPD-1, respectively (log-rank  $P = 0.88$ ), with an HR of 1.29 (95% CI, 0.51–3.22). For  
 229 sCTLA-4 (high,  $n = 18$ ; low,  $n = 25$ ), median PFS was 26.5 months versus not reached  
 230 for low and high sCTLA-4, respectively (log-rank  $P = 0.82$ ), with an HR of 1.16 (95%  
 231 CI, 0.47–2.83). (D) Kaplan-Meier curves for PFS among patients according to the  
 232 number of favorable immune factors defined as sCTLA-4 or sPD-L1 levels below the  
 233 cutoff values (log-rank  $P = 0.81$ ). Median PFS was 15.1, 16.9, and 26.5 months for 2, 1,  
 234 and 0 favorable factors, respectively. The HR for 1 ( $n = 8$ ) versus 0 ( $n = 18$ ) was 1.49  
 235 (95% CI, 0.45–4.95), and that for 2 ( $n = 17$ ) versus 0 was 1.43 (95% CI, 0.52–3.95).

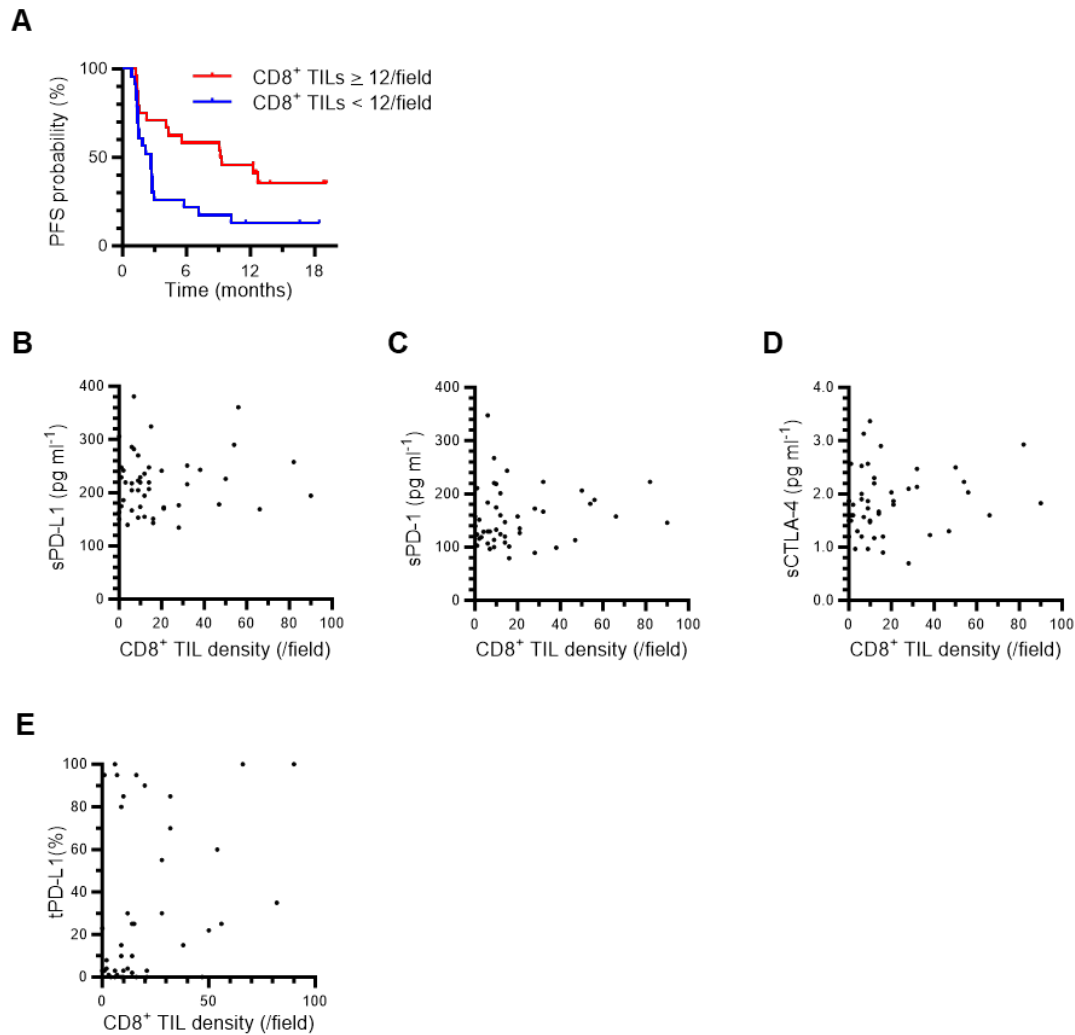

236

237 **Supplemental Figure 12. Stratification of patients in the Nivolution trial according**  
 238 **to CD8<sup>+</sup> TIL density.** (A) Kaplan-Meier curves for PFS of patients with hot or cold  
 239 tumors defined on the basis of the number of CD8<sup>+</sup> TILs [ $\geq 12.0/\text{field}$  ( $n = 23$ ) or  
 240  $< 12.0/\text{field}$  ( $n = 24$ ), respectively]. Median PFS was 9.2 and 2.6 months for hot and cold  
 241 tumors, respectively (log-rank  $P = 0.013$ ), with an HR of 0.43 (95% CI, 0.22–0.86). (B–  
 242 E) Pearson correlation of CD8<sup>+</sup> TIL density and either plasma levels of sPD-L1 (B),  
 243 sPD-1 (C), or sCTLA-4 (D) or tPD-L1 expression level (E) ( $n = 47$ ).

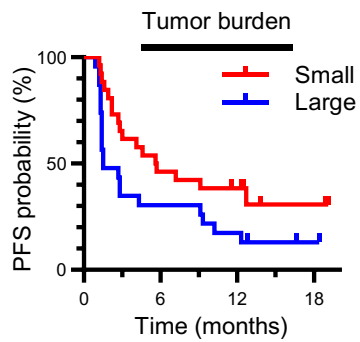

244

245 **Supplemental Figure 13.** Kaplan-Meier curves for PFS of patients in the Nivolution  
 246 trial according to large or small tumor burden based on the median value. Median PFS  
 247 was 5.7 versus 1.5 months for small ( $n = 26$ ) and large ( $n = 23$ ) tumor burden,  
 248 respectively (log-rank  $P = 0.04$ ), with an HR of 0.52 (95% CI, 0.27–1.02).

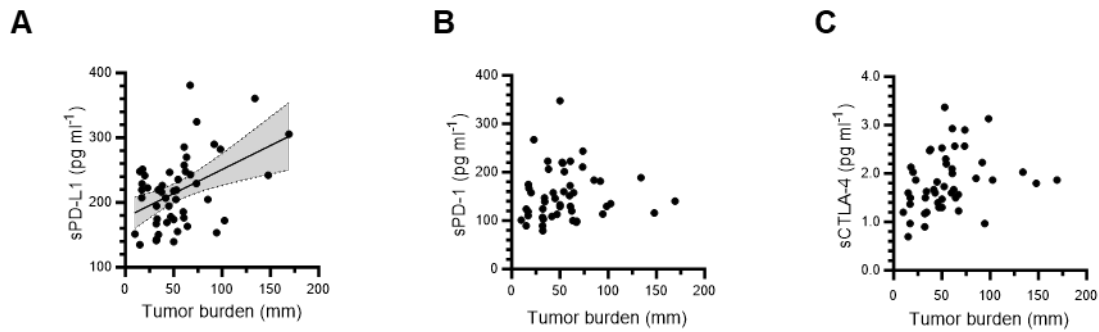

249

250 **Supplemental Figure 14. Correlation between soluble immune factor**  
 251 **concentrations and tumor burden for patients in the Nivolumab trial.** Pearson  
 252 correlation was examined for plasma concentrations of sPD-L1 (A), sPD-1 (B), or  
 253 sCTLA-4 (C) and tumor burden ( $n = 49$ ). A moderate correlation is apparent in (A),  
 254 with an  $R$  value of 0.46 and  $P = 0.0013$ ; the gray shaded area above and below the solid  
 255 line and bounded by the dotted lines indicates the 95% CI.

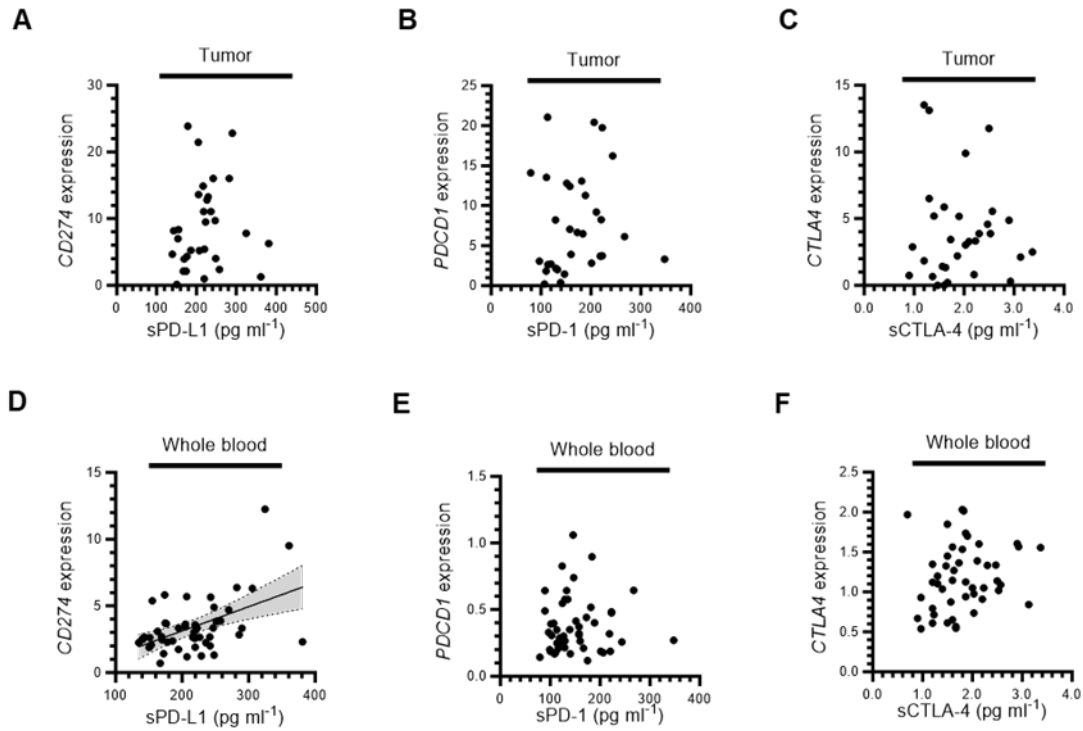

256

257

**Supplemental Figure 15. Correlation between soluble immune factor**

258

**concentrations and expression of the corresponding genes for patients in the**

259

**Nivolumab trial.** Pearson correlation was examined for plasma levels of sPD-L1 (A and

260

**D), sPD-1 (B and E), or sCTLA-4 (C and F) and expression levels of the corresponding**

261

**genes in tumor tissue ( $n = 31$ ) (A–C) or whole-blood cells ( $n = 48$ ) (D–F). A moderate**

262

**correlation was apparent in (D), with an  $R$  value of 0.50 and  $P < 0.001$ ; the gray shaded**

263

**area above and below the solid line and bounded by the dotted lines indicates the 95%**

264

**CI.**

265

266 **Supplemental Table 1. Patient characteristics for cohort D (cytotoxic**  
 267 **chemotherapy cohort) and cohort E (TKI cohort)**

|                                   | Cohort D<br>(cytotoxic<br>chemotherapy,<br><i>n</i> = 42) |      | Cohort E<br>(TKI, <i>n</i> = 43) |       |
|-----------------------------------|-----------------------------------------------------------|------|----------------------------------|-------|
|                                   | No.                                                       | %    | No.                              | %     |
| Age, years                        |                                                           |      |                                  |       |
| Median (range)                    | 69.5(33-85)                                               |      | 71 (40-83)                       |       |
| Sex                               |                                                           |      |                                  |       |
| Male                              | 32                                                        | 76.2 | 24                               | 55.8  |
| Female                            | 10                                                        | 23.8 | 19                               | 44.2  |
| Smoking history                   |                                                           |      |                                  |       |
| Current or former                 | 34                                                        | 78.6 | 19                               | 44.2  |
| Never                             | 9                                                         | 21.4 | 24                               | 55.8  |
| Unknown                           | 0                                                         | 0    | 1                                | 0.7   |
| ECOG performance status           |                                                           |      |                                  |       |
| 0                                 | 24                                                        | 57.1 | 14                               | 32.6  |
| 1                                 | 17                                                        | 40.5 | 23                               | 53.5  |
| 2                                 | 1                                                         | 2.4  | 3                                | 7.0   |
| 3                                 | 0                                                         | 0    | 2                                | 4.7   |
| Unknown                           | 0                                                         | 0    | 1                                | 2.3   |
| Histology                         |                                                           |      |                                  |       |
| Adenocarcinoma                    | 32                                                        | 76.2 | 42                               | 97.7  |
| Squamous cell carcinoma           | 10                                                        | 23.8 | 1                                | 2.3   |
| Other                             | 0                                                         | 0    | 0                                | 0     |
| Mutation status                   |                                                           |      |                                  |       |
| None                              | 34                                                        | 81.0 | 0                                | 0     |
| Positive for <i>EGFR</i> mutation | 4                                                         | 9.5  | 43                               | 100.0 |
| Positive for <i>EML4-ALK</i>      |                                                           |      | 0                                | 0     |
| rearrangement                     | 2                                                         | 4.8  |                                  |       |
| Other                             | 2 <sup>A</sup>                                            | 4.8  | 0                                | 0     |
| Type of treatment                 |                                                           |      |                                  |       |
| Platinum agent plus pemetrexed    | 25                                                        | 59.5 | 36                               | 0     |
| Platinum agent plus taxane        | 14                                                        | 33.3 | 66                               | 0     |
| Nonplatinum monotherapy           | 3                                                         | 7.1  | 23                               | 0     |
| EGFR-TKIs                         | 0                                                         | 0    | 43                               | 100.0 |

268 ECOG, Eastern Cooperative Oncology Group.

269 <sup>A</sup>*BRAF* mutation, *n* = 1; *MET* skipping mutation, *n* = 1.

270 **Supplemental Table 2. Multivariate analysis of predictive factors for nivolumab**  
 271 **efficacy in the Nivolution trial**

| Variable                                              | Coefficient | 95% CI    | <i>P</i> value |
|-------------------------------------------------------|-------------|-----------|----------------|
| Sex                                                   | 0.96        | 0.45–2.03 | 0.91           |
| Age                                                   | 1.01        | 0.97–1.04 | 0.51           |
| Histology                                             | 1.22        | 0.50–2.94 | 0.66           |
| Driver mutation<br>( <i>EGFR/ALK</i> )                | 1.26        | 0.46–3.44 | 0.66           |
| tPD-L1 (TPS: <50%<br>vs. ≥50%)                        | 0.09        | 0.03–0.30 | <0.001         |
| Tumor burden                                          | 1.52        | 0.71–3.28 | 0.28           |
| Number of<br>favorable immune<br>factors <sup>A</sup> | 0.41        | 0.24–0.70 | 0.001          |

272 <sup>A</sup>Defined as sCTLA-4 or sPD-L1 concentrations below the determined cutoff values.

**Conflict of interest:**

HH has received support for the present study from Ono Pharmaceutical Co. Ltd. and Sysmex Corporation; honoraria from Amgen KK, AstraZeneca KK, Blueprint Medicines, Boehringer Ingelheim Japan Inc., Bristol-Myers Squibb Co. Ltd., Chugai Pharmaceutical Co. Ltd., Daiichi Sankyo Co. Ltd., Eli Lilly Japan KK, Janssen Pharmaceutical KK, Merck Biopharma Co. Ltd., MSD KK, Novartis Pharmaceuticals KK, Ono Pharmaceutical Co. Ltd., Sysmex Corporation, Taiho Pharmaceutical Co. Ltd., and Takeda Pharmaceutical Co. Ltd.; consulting fees from AstraZeneca KK, AbbVie GK, Boehringer Ingelheim Japan Inc., Bristol-Myers Squibb Co. Ltd., Chugai Pharmaceutical Co. Ltd., Daiichi Sankyo Co., Ltd. Janssen Pharmaceutical KK, Eli Lilly Japan KK, Guardant Health, Nippon Boehringer Ingelheim Co. Ltd., Novocure, Pfizer Japan Inc., Takeda Pharmaceutical Co. Ltd., and Merck Biopharma Co. Ltd.; and research funding from IQVIA Services JAPAN KK, Eisai Co. Ltd., SYNEOS HEALTH CLINICAL KK EP-CRSU CO., LTD., EPS Corporation., Shionogi & Co. Ltd., Nippon Kayaku Co. Ltd., Otsuka Pharmaceutical Co. Ltd., Takeda Pharmaceutical Co. Ltd., GlaxoSmithKline KK, MSD KK, Sanofi KK, Amgen Inc., Chugai Pharmaceutical Co. Ltd., Taiho Pharmaceutical Co. Ltd, Nippon Boehringer Ingelheim Co. Ltd., Bristol Myers Squibb Company, SRL Medisearch Inc., Janssen Pharmaceutical KK, PRA Health Sciences Inc., CMIC CO. Ltd., Astellas Pharma Inc. Pfizer R&D Japan GK, Ascent Development Services, Labcorp Development Japan KK, Eisai Inc., Kobayashi Pharmaceutical Co. Ltd., Bayer Yakuin Ltd., and Pfizer Japan Inc.

KC has received research funding from Meiji Seika Pharma Co. Ltd., Meiji Holdings Co. Ltd., Shimazu Corporation, and Menarini Biomarkers Singapore; honoraria from Cosmo Bio Co. Ltd., Bristol Myers Squibb Japan, Merck KGaA, AstraZeneca KK, CHUGAI PHARMACEUTICAL CO. LTD., Novartis Pharma KK, Hitachi Ltd., Corning Incorporated, Agilent Technologies Japan Ltd., and SBI Pharmaceuticals Co. Ltd.

YT received honoraria from Ono Pharmaceutical Co. Ltd., AstraZeneca KK, Bristol-Myers Squibb Co. Ltd., Chugai Pharmaceutical Co. Ltd. MSD KK, Ono Pharmaceutical Co. Ltd, and Eisai KK; research funding from Daiichi-Sankyo, KORTUC, Janssen Pharma, and AstraZeneca; consultation fee from SONIRE Therapeutics Inc.



KF received honoraria from Chugai Pharmaceutical Co. Ltd. and KYORIN Pharmaceutical Co. Ltd.

ST received honoraria from Illumina, Inc. and NanoString Technologies.

K Haratani received honoraria from AS ONE Corporation and AstraZeneca KK and research funding from AstraZeneca KK.

TT received honoraria from AstraZeneca KK, Chugai Pharmaceutical Co. Ltd., MSD KK, Merck Biopharma Co. Ltd., Novartis Pharma KK, Takeda Pharmaceutical Co. Ltd., Taiho Pharmaceutical Co. Ltd., and Roche diagnostics.

JT received honoraria from AbbVie GK, AstraZeneca KK, Boehringer-Ingelheim Japan Inc., Bristol-Myers Squibb Co. Ltd., Chugai Pharmaceutical Co. Ltd, Daiichi sankyo Co. Ltd., Eli Lilly Japan KK, Janssen Pharmaceutical KK, MSD KK, Nihon Medi-Physics Co. Ltd, Nippon Kayaku Co. Ltd, Taiho Pharmaceutical Co. Ltd., Takeda Pharmaceuticals, Ono pharmaceutical Co. Ltd, and Pfizer Japan Inc.

TY received honoraria from Daiichi sankyo Co., Ltd., Pfizer Japan Inc., and Hisamitsu Pharmaceutical Co. Inc.

KT received honoraria from AstraZeneca KK, Merck Biopharma Co. Ltd., Eisai Co. Ltd., Bristol-Myers Squibb Co. Ltd., Ono pharmaceutical Co. Ltd, MSD KK, Chugai Pharmaceutical Co. Ltd, Takeda Pharmaceutical Co. Ltd., Taiho Pharmaceutical Co. Ltd., Merck Biopharma Co. Ltd., Novartis Pharma KK, and Kyowa Hakko Kirin Co. Ltd.

MT received honoraria from Chugai Pharmaceutical Co. Ltd, Novartis Pharma KK, AstraZeneca KK, Ono pharmaceutical Co. Ltd, Bristol-Myers Squibb Co. Ltd., Boehringer Ingelheim Japan Inc., and Takeda Pharmaceutical Co. Ltd.

HY received honoraria from Chugai Pharmaceutical Co. Ltd., MSD. KK, Bristol-Myers Squibb Co. Ltd., Ono Pharmaceutical Co. Ltd., and AstraZeneca KK; research funds from Chugai

Pharmaceutical Co. Ltd.

HO received honoraria from Chugai Pharmaceutical Co. Ltd., Sanofi KK, Eli Lilly Japan KK, MSD KK, AstraZeneca KK, Pfizer Japan Inc., Bristol Myers Squibb, and Takeda Pharmaceutical Co. Ltd.

KS received honoraria from Chugai Pharmaceutical Co. Ltd., Life Technologies Japan Ltd., Takeda Pharmaceutical Co. Ltd., Qiagen, Inc., Yodosha Co. Ltd, and Nippon Kayaku Co. Ltd.

MG, KH, HU, and CS are employees of Sysmex Corporation.

T Hirai received honoraria from Chugai Pharmaceutical Co. Ltd., Bristol-Myers Squibb Co. Ltd., and AstraZeneca KK.

K Nishio received honoraria from Boehringer Ingelheim Japan, Maruho Co. Ltd., AstraZeneca KK, Chugai Pharmaceutical Co. Ltd., Novartis Pharma KK, Eisai Co. Ltd., MSD KK, Bristol-Myers Squibb Co. Ltd., Ono pharmaceutical Co. Ltd, Pfizer Japan Inc., Sanofi SA, Guardant Health, Eli Lilly Japan KK, Amgen KK, Merck Biopharma Co. Ltd., Roche Diagnostics KK, Yakult Honsha Co. Ltd., Takeda Pharmaceutical Co. Ltd. Fujirebio Inc., Janssen Pharmaceutical KK; consulting fee from SymBio Pharmaceuticals KK, Eli Lilly Japan KK, and Otsuka Pharmaceutical Co. Ltd.; research funding from National Hospital Organization Osaka Minami Medical Center, Boehringer Ingelheim Japan Inc., West Japan Oncology Group, Thoracic Oncology Research Group, Nichirei Biosciences Inc. Eli Lilly Japan KK, Hitachi Life Technologies, and Sysmex Corporation.

K Nakagawa received honoraria from Ono Pharmaceutical Co. Ltd., Amgen Inc., Nippon Kayaku Co. Ltd., AstraZeneca KK, Chugai Pharmaceutical Co. Ltd., Eli Lilly Japan KK, MSD KK, Pfizer Japan Inc., Nippon Boehringer Ingelheim Co. Ltd., Taiho Pharmaceutical Co. Ltd., Bayer Yakuhin Ltd., CMIC ShiftZero KK, Life Technologies Japan Ltd., Neo Communication, Roche Diagnostics KK, AbbVie Inc., Merck Biopharma Co. Ltd., Kyowa Kirin Co. Ltd., Takeda Pharmaceutical Co. Ltd., 3H Clinical Trial Inc., Care Net Inc., Medical Review Co. Ltd., Medical Mobile Communications Co. Ltd, YODOSHA CO. LTD., Nikkei Business Publications Inc., Japan Clinical Research Operations, CMIC Co. Ltd., Novartis Pharma KK, TAIYO Pharma Co.

Ltd., KYORIN Pharmaceutical Co. Ltd., Bristol-Myers Squibb KK; consulting fees from Eli Lilly Japan KK, KYORIN Pharmaceutical Co. Ltd., Ono Pharmaceutical Co. Ltd., Pfizer Japan Inc.; patent planned for institution from Daiichi Sankyo Co., Ltd. (Patent no. US20200173999A1); research funding from AstraZeneca KK, MSD KK, Ono Pharmaceutical Co. Ltd., Nippon Boehringer Ingelheim Co. Ltd., Novartis Pharma KK, Pfizer Japan Inc., Bristol Myers Squibb Company, Eli Lilly Japan KK, Chugai Pharmaceutical Co. Ltd., Daiichi Sankyo Co. Ltd., Merck Biopharma Co. Ltd., PAREXEL International Corp., PRA HEALTHSCIENCES, EPS Corporation, Kissei Pharmaceutical Co. Ltd., EPS International Co. Ltd., Taiho Pharmaceutical Co. Ltd., PPD-SNBL KK, SymBio Pharmaceuticals Limited, IQVIA Services JAPAN KK, SYNEOS HEALTH CLINICAL KK, Nippon Kayaku Co. Ltd., EP-CRSU Co. Ltd., Mebix Inc., Janssen Pharmaceutical KK, AbbVie Inc., Bayer Yakuhin Ltd, Eisai Co. Ltd., Mochida Pharmaceutical Co. Ltd., Covance Japan Inc., Japan Clinical Research Operations, Takeda Pharmaceutical Co. Ltd., GlaxoSmithKline KK, Sanofi KK, Sysmex Corporation, Medical Reserch Support, Otsuka Pharmaceutical Co. Ltd.,SRL Inc., Pfizer R&D Japan GK, Amgen Inc.

T Honjo has received grant support for the present study from Ono Pharmaceutical Co. Ltd.; research grants from Sysmex Corp., Shimazu Corporation, Meiji Holdings Co. Ltd., Meiji Seika Pharma Co. Ltd., Menarini Biomarkers Singapore, and Bristol-Myers Squibb Co. Ltd.; and royalties from Ono Pharmaceutical Co. Ltd.

KC, HH, K Nakagawa, and T Honjo are authors on Patent: B 6719117, Method, reagent kit, device and computer program for assisting determination of efficacy of immune checkpoint inhibitor.
